# Supplementary material for: Fluoride-specific fluorescence/MRI bimodal probe based on a gadolinium(iii)–flavone complex: synthesis, mechanism and bioimaging application in vivo
Source: Royal Society of Chemistry journal article supplement (doi:10.1039/c6tb02384c), 2016-01-01
Supplement: c6tb02384c1.pdf [file c6tb02384c1.pdf]

# **Fluoride-specific fluorescence/MRI bimodal probe based on a Gadolinium(III)-flavone complex: Synthesis, mechanism and bioimaging application *in vivo***

Yue Wang<sup>a</sup>, Run Zhang,<sup>a,b</sup> Renfeng Song,<sup>c</sup> Ke Guo,<sup>c</sup> Qingtao Meng<sup>a\*,d</sup>, Huan Feng<sup>a</sup>, Chunying Duan,<sup>d</sup> Zhiqiang Zhang<sup>a\*</sup>

<sup>a</sup> School of Chemical Engineering, University of Science and Technology Liaoning, 185 Qianshan Zhong Road, Anshan, 114044, P. R. China

E-mail: [qtmeng@ustl.edu.cn](mailto:qtmeng@ustl.edu.cn); [zhangzhiqiang@ustl.edu.cn](mailto:zhangzhiqiang@ustl.edu.cn), Tel: +86-412-5928009

<sup>b</sup> Australian Institute for Bioengineering and Nanotechnology, The University of Queensland, Brisbane, 4072, Australia

<sup>c</sup> Mining Design & Research Institute of Ansteel Group Corporation, 27 Lvhu Street, Anshan, 114002, P. R. China

<sup>d</sup> State Key Laboratory of Fine Chemicals, Dalian University of Technology, 2 Linggong Road, Dalian High-Tech Industrial Zone 116024, P. R. China

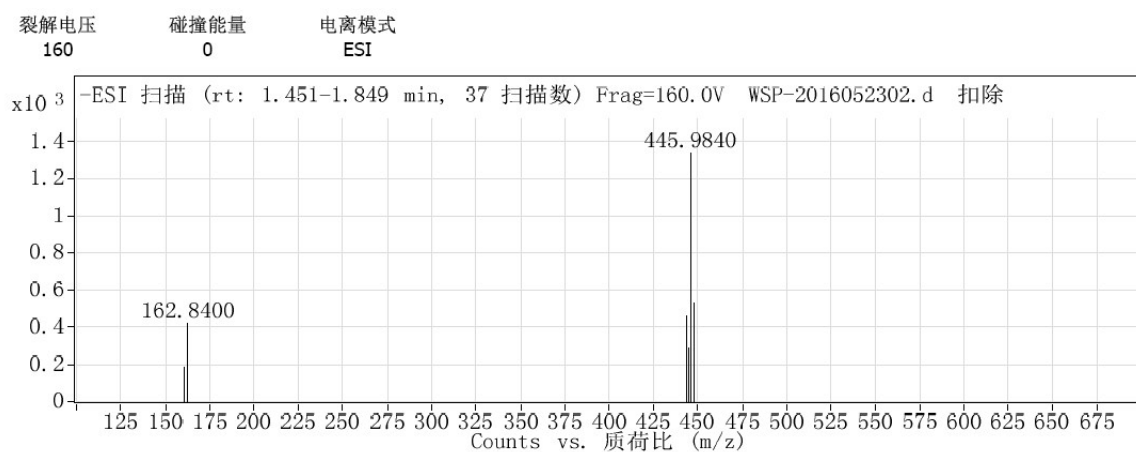

**Fig. S1.** ESI-MS spectrum of [EDTA-Gd]<sup>-</sup>

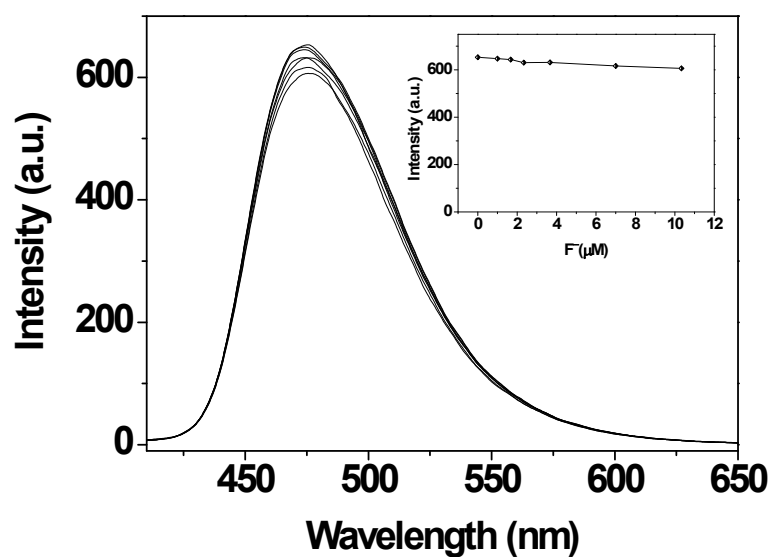

**Fig. S2.** Fluorescence spectra of EDTA-Gd-**HF** (10  $\mu\text{M}$ ) in the presence of increasing amount of fluoride ions (0–10  $\mu\text{M}$ ) in aqueous ( $\text{C}_2\text{H}_5\text{OH}$ :  $\text{H}_2\text{O}$  = 3:7). Insert: plot of the fluorescence intensity changes of EDTA-Gd-**HF** (10  $\mu\text{M}$ ) observed at 476 nm versus fluoride ions concentration. Excitation was performed at 400 nm.

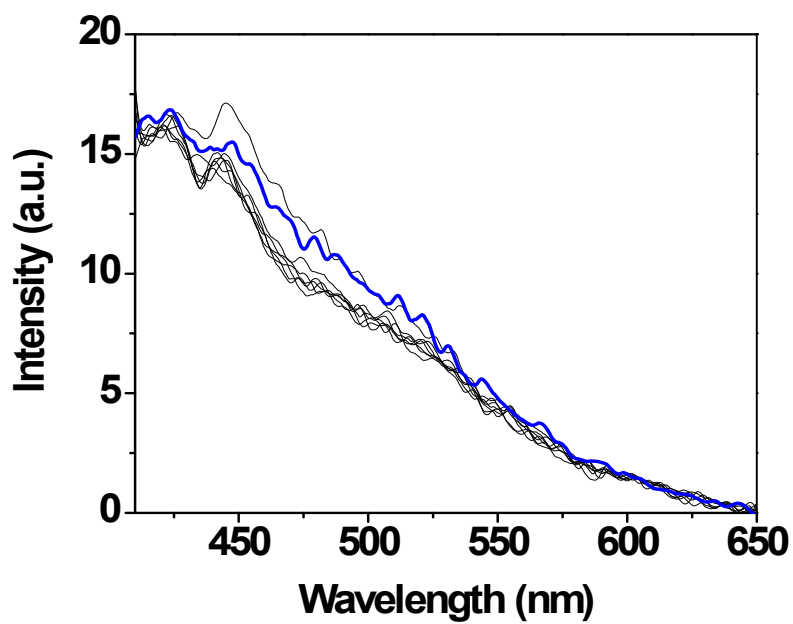

**Fig. S3.** Fluorescence spectra of **HF** (10  $\mu$ M) in the presence of increasing amount of fluoride ions in aqueous ( $\text{C}_2\text{H}_5\text{OH}$ :  $\text{H}_2\text{O}$  = 3:7). Excitation was performed at 400 nm.

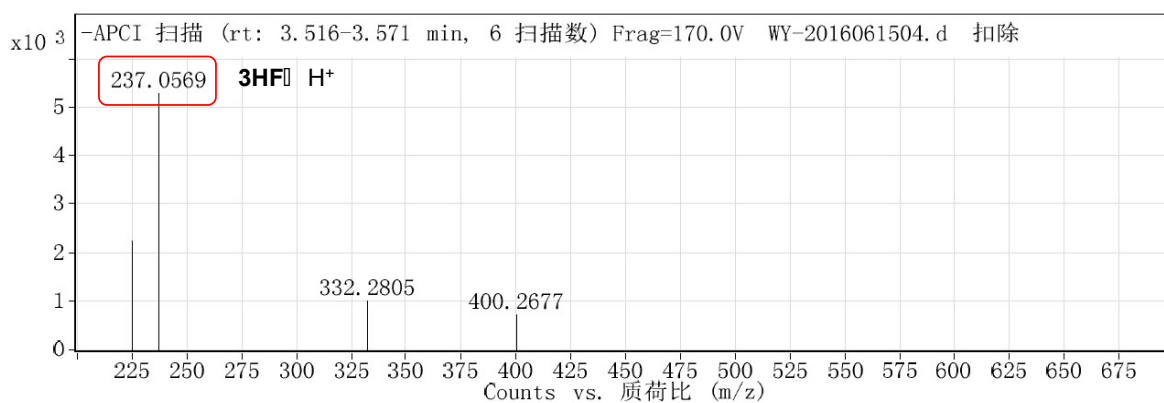

**Fig. S4.** ESI-MS spectrum of EDTA-Gd-**HF** in presence of fluoride ions in aqueous

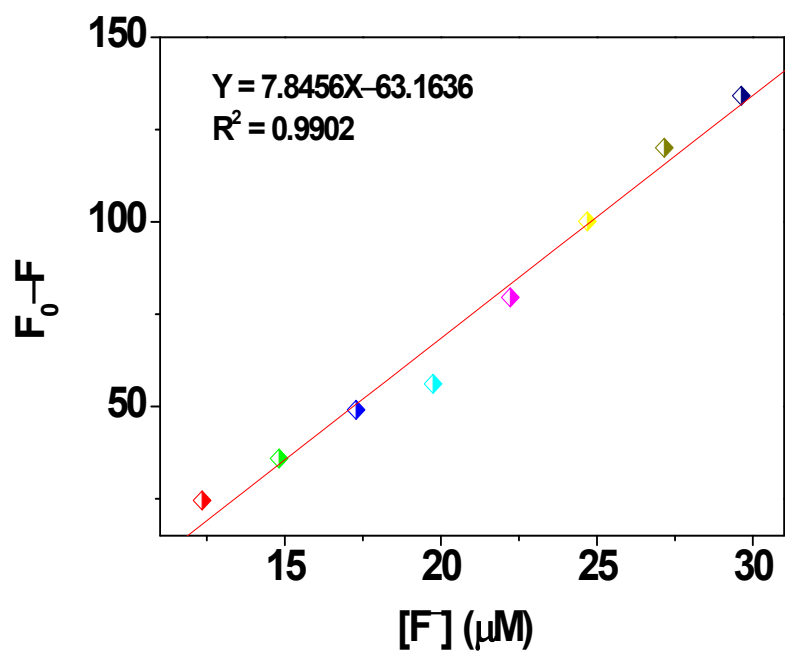

**Fig. S5.** Linear relationship between fluorescence intensity of EDTA-Gd-HF (3 μM) at 476 nm versus the concentration of fluoride ion (10–30 μM) in aqueous (CH<sub>3</sub>OH: H<sub>2</sub>O = 3:7). Excitation was performed at 400 nm.

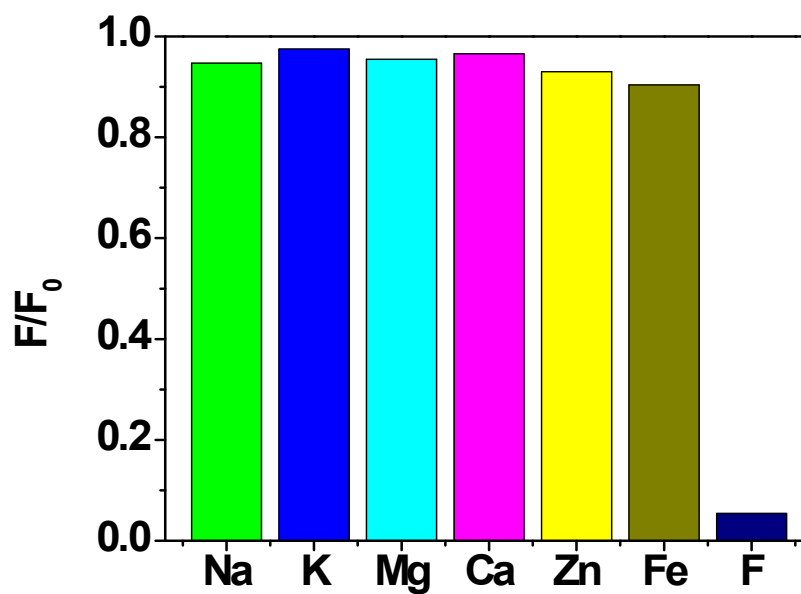

**Fig. S6.** Fluorescence responses of EDTA-Gd-HF (10 μM) in the presence of various biological cations (0.5 mM) in aqueous (C<sub>2</sub>H<sub>5</sub>OH: H<sub>2</sub>O = 3:7). The intensities were recorded at 476 nm. Excitation was performed at 400 nm.

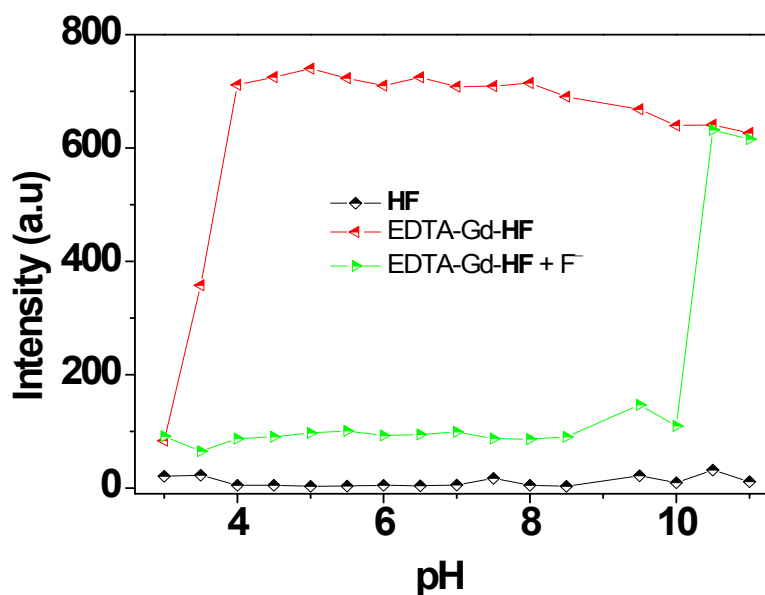

**Fig. S7.** Influence of pH on the fluorescence intensities of **HF**, EDTA-Gd-**HF** and EDTA-Gd-**HF** in the presence of fluoride ion. The intensities were recorded at 476 nm. Excitation was performed at 400 nm.

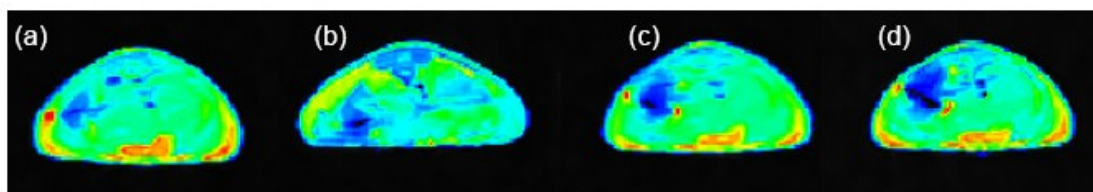

**Fig. S8.** T<sub>1</sub>-weighted MR transection images of living white mice after injection of: (a) EDTA-Gd-**HF** (0.2 mL, 0.2 mM), (b) 3.5 mM fluoride ions only, (c) 3.5 mM fluoride ions followed by injection of 0.2 mL EDTA-Gd-**3HF** (0.2 mM), and (d) further injection of 3.5 mM mixed anions into (c).
